# Supplementary material for: GeLC-MS-based proteomics of Chromobacterium violaceum: comparison of proteome changes elicited by hydrogen peroxide
Source: PubMed Central journal article supplement (PMC4913304; doi:10.1038/srep28174), 2016-06-20
Supplement: srep28174-s1.pdf [file srep28174-s1.pdf]

## Supplementary Information

### **GeLC-MS-based proteomics of *Chromobacterium violaceum*: comparison of proteome changes elicited by hydrogen peroxide**

Lima, D.C<sup>1</sup>, Duarte, F.T<sup>2</sup>, Medeiros, V.K.S<sup>3</sup>, Carvalho, P.C<sup>4</sup>., Nogueira, F.C.S<sup>5</sup>, Araujo G.D.T<sup>5</sup>, Domont G.B<sup>5</sup>, Batistuzzo de Medeiros, S.R<sup>1</sup>

1. Laboratório de Biologia Molecular e Genômica, Centro de Biociências, Universidade Federal do Rio Grande do Norte, Campus Universitário s/n, Lagoa Nova, Natal, RN, 59072-970 Brazil
2. Instituto Federal de Educação, Ciência e Tecnologia do Rio Grande do Norte (IFRN) - RN, Brazil
3. Colegiado de Medicina, Universidade Federal do Vale do São Francisco, Avenida José de Sá Maniçoba, S/N, Centro, Petrolina, PE, 56304-917, Brazil
4. Laboratório de Proteômica e Engenharia de Proteínas, Instituto Carlos Chagas, Fiocruz, Avenida Prof. Algacyr Munhoz Mader, Curitiba, PR, 8135010, PR, Brazil
5. Unidade Proteômica, Laboratório de Química de Proteínas, Bloco A - sala 543, Centro de Tecnologia, Universidade Federal do Rio de Janeiro, Av. Athos da Silveira Ramos, 149, Cidade Universitária, Rio de Janeiro, RJ, 21941 - 909- Brazil.

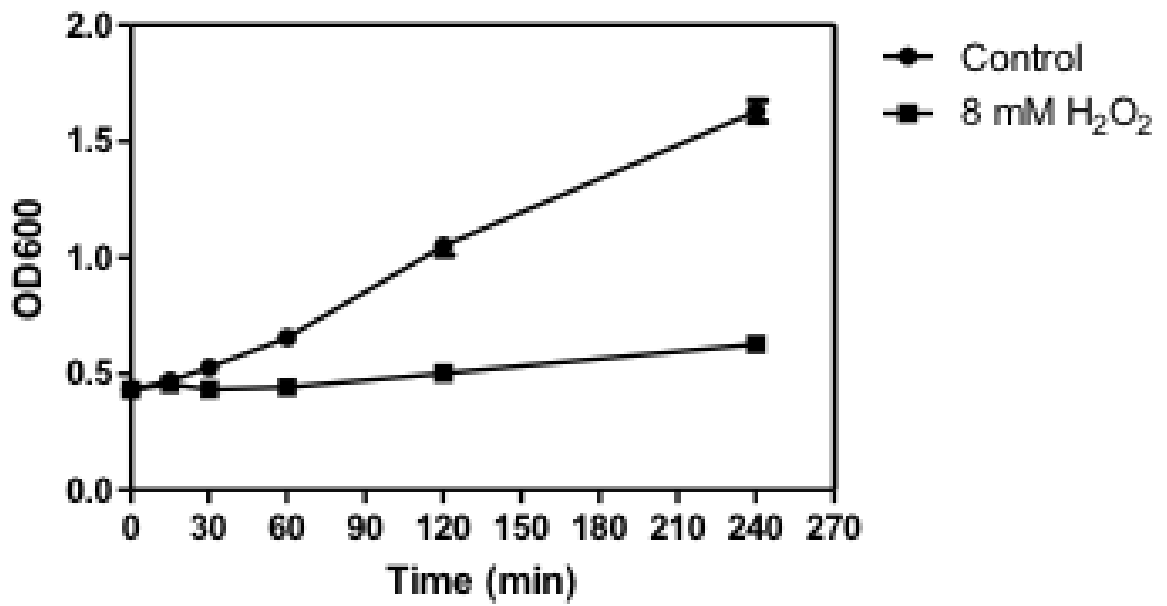

Supplementary Figure S1: Cellular growth curve. Effect of treatment with H<sub>2</sub>O<sub>2</sub> on the cellular growth curve of *C. violaceum*. Time “0” is the OD between 0.4-0.5 when the hydrogen peroxide treatment has begun.

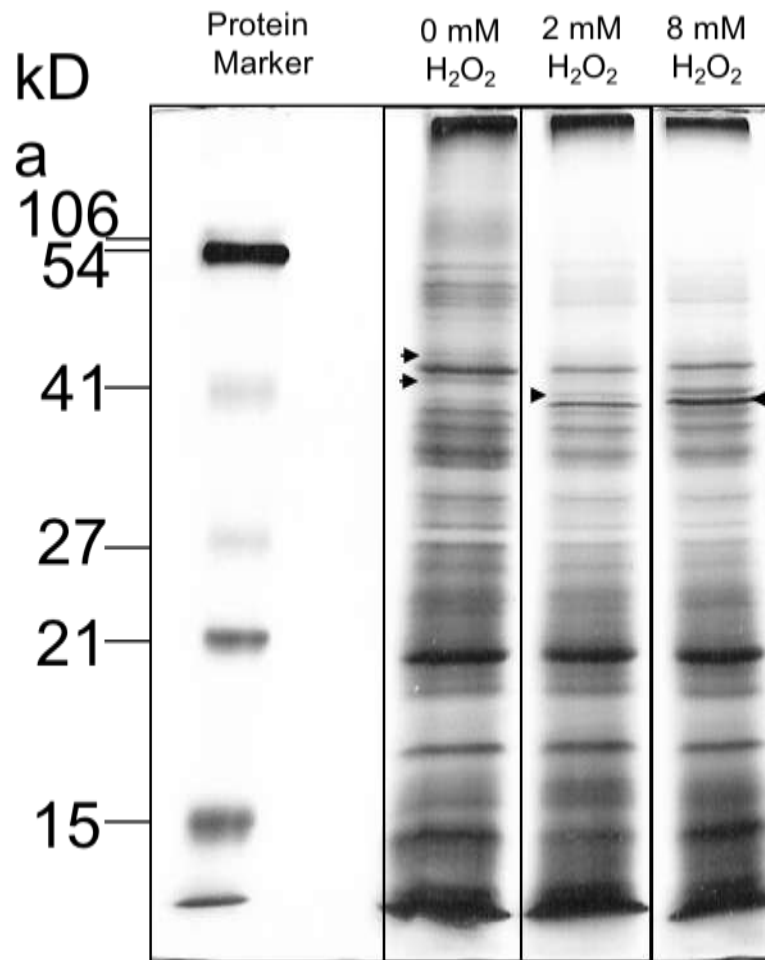

Supplementary Figure S2: SDS-PAGE with total proteins from *C. violaceum* extracted in the absence (lane 2) and in the presence of 2 mM (lane 3) and 8 mM (lane 4) of hydrogen peroxide. The black arrows indicate protein bands that changed their pattern after oxidative stress exposure.

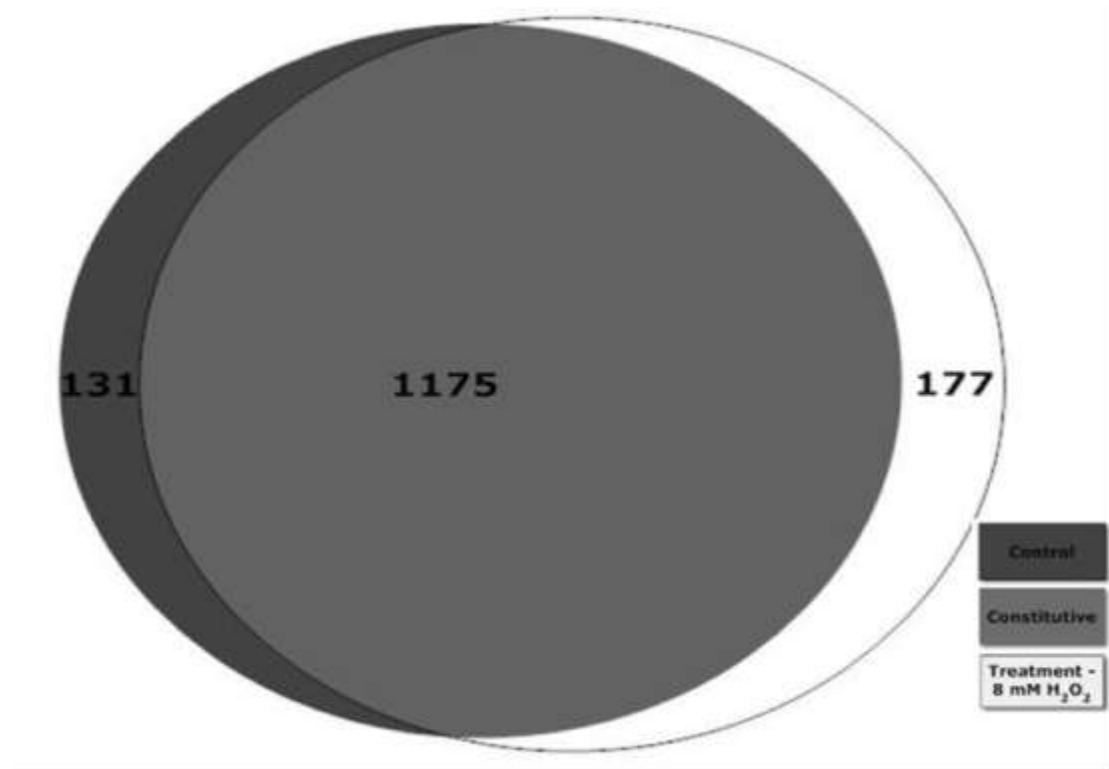

Supplementary Figure S3: Venn diagram of proteins identified in the three repetitions of treatments with 8 mM of H<sub>2</sub>O<sub>2</sub> and controls in the absence of H<sub>2</sub>O<sub>2</sub>. Dark grey: exclusively control proteins; White: specific proteins of cells treated with H<sub>2</sub>O<sub>2</sub>; Light grey: proteins abundance under both conditions. Only proteins detected in the three biological replicates of a specific condition were considered.

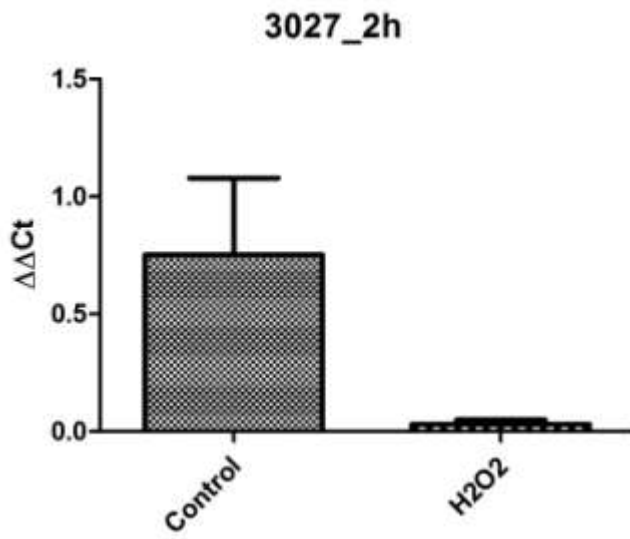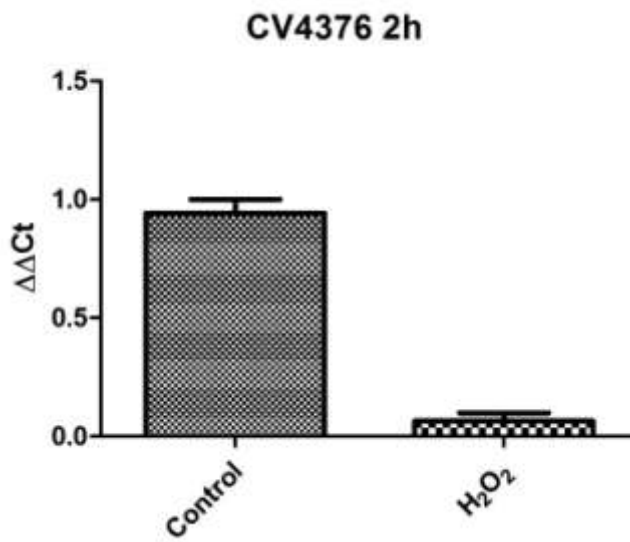

Supplementary Figure S4 : Real-time PCR of ferredoxin (CV\_3027) and *bioC* (CV\_4376) after 2 hour exposure with 8 mM H<sub>2</sub>O<sub>2</sub>.

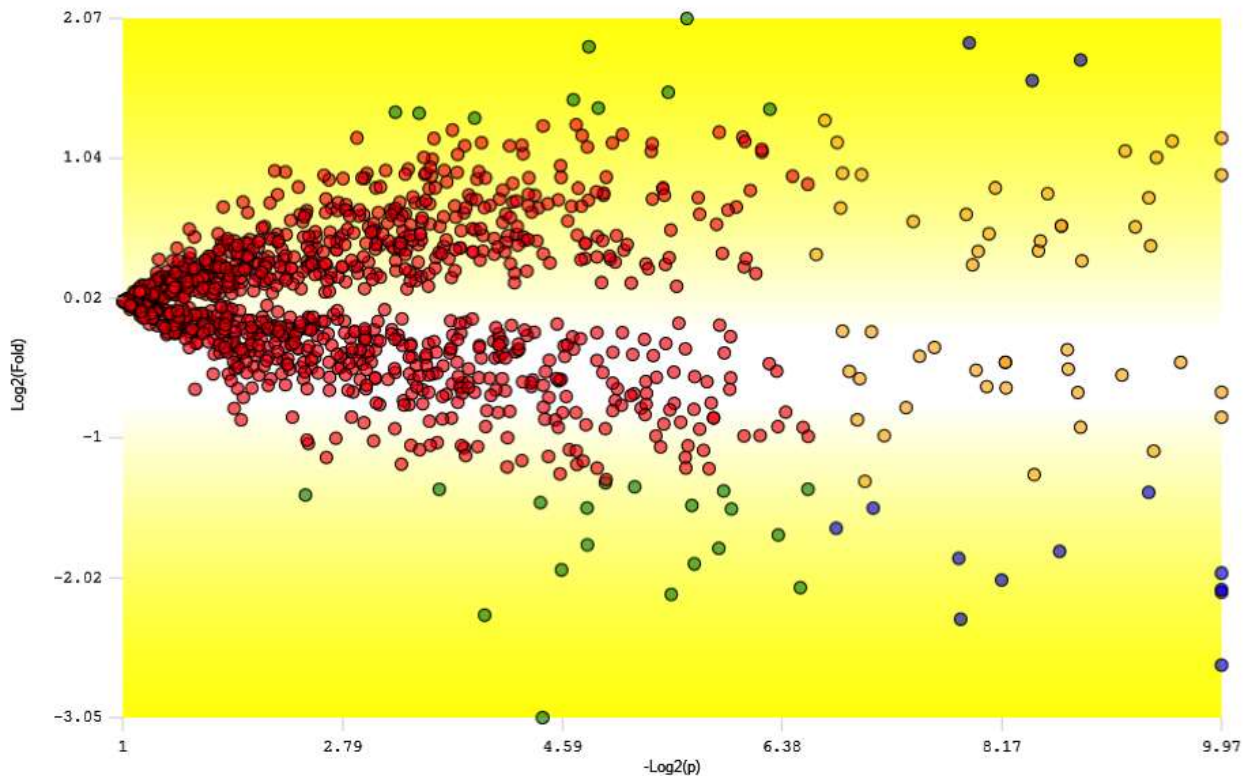

Supplementary Figure S5: Differential expression of *C. violaceum* proteins. Graph shows TFold values and compares protein level under treated and oxidative stress conditions induced by 8 mM H<sub>2</sub>O<sub>2</sub>. This analysis considers only proteins detected in at least two biological replicates. Each dot symbolizes a protein; ordinates represent protein abundance change and abscissas the p-value of the t-test. The fold change value is the number of times obtained by calculating the ratio of average relative peptide quantification values for each condition studied. Parameters established for this analysis were  $q < 0.01$  and variable fold-change cutoff, with blue dots identifying proteins that satisfy these two parameters. Proteins represented by orange dots were identified as statistically different, although they do not comply with variable cutoff parameters for changes in number of times. Those depicted by orange dots satisfy the variation cutoff for number of times, but do not meet statistical criteria. Red dots do not comply with either of the criteria.

The theoretical BH false-positive estimator ( $q < 0.05$ ) indicates that proteins identified as differentially expressed are in fact so. There are 1000 dots in the graph: 14 blue, 28 green, 51 orange and the remainder red.

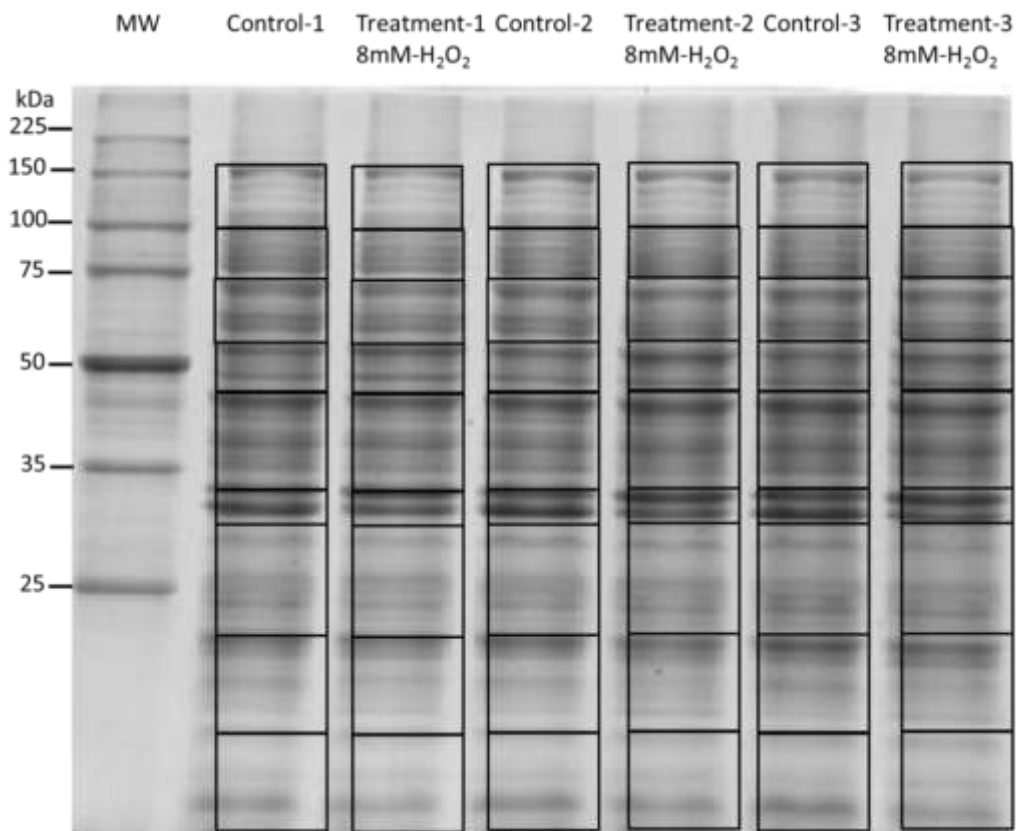

Supplementary Figure S6: SDS-PAGE of total proteins extracted from *C. violaceum* in the absence and presence of 8 mM H<sub>2</sub>O<sub>2</sub>. Three biological replicates for each condition were used. Prior to trypsin digestion, each lane was sliced in 9 pieces (squares in the figure).

Supplementary Table S1\*: Proteins, with their respective signals, detected in both treatment and control conditions.

\* This table is in a separated .xlf file.

Supplementary Table S2: Re-annotation and genomic context of hypothetical and/or conserved hypothetical proteins detected exclusively in oxidative stress condition.

| ORF            | Protein                          | Genome context (operon) | E-value           | Organism                       | Protein                                   | Query coverage (%) | Identity (%) | OBS                    |
|----------------|----------------------------------|-------------------------|-------------------|--------------------------------|-------------------------------------------|--------------------|--------------|------------------------|
| <b>CV_0424</b> | Putative uncharacterized protein | CV_0421                 | 8e <sup>-44</sup> | <i>Pseudomonas putida</i> GB-1 | putative pyocin R2_PP, tail fiber protein | 96                 | 40           | Probable viral protein |
|                |                                  | CV_0422                 |                   |                                |                                           |                    |              |                        |
|                |                                  | CV_0423                 |                   |                                |                                           |                    |              |                        |
|                |                                  | CV_0424                 |                   |                                |                                           |                    |              |                        |
|                |                                  | CV_0425                 |                   |                                |                                           |                    |              |                        |
|                |                                  | CV_0426                 |                   |                                |                                           |                    |              |                        |
| <b>CV_0425</b> | Putative uncharacterized protein | CV_0421                 | -                 | -                              | hypothetical protein                      | -                  | -            | Probable viral protein |
|                |                                  | CV_0422                 |                   |                                |                                           |                    |              |                        |
|                |                                  | CV_0423                 |                   |                                |                                           |                    |              |                        |
|                |                                  | CV_0424                 |                   |                                |                                           |                    |              |                        |
|                |                                  | CV_0425                 |                   |                                |                                           |                    |              |                        |
|                |                                  | CV_0426                 |                   |                                |                                           |                    |              |                        |



|                |                                   |                                                                              |                   |                                                                                    |                                           |                      |     |    |                              |
|----------------|-----------------------------------|------------------------------------------------------------------------------|-------------------|------------------------------------------------------------------------------------|-------------------------------------------|----------------------|-----|----|------------------------------|
| <b>CV_3909</b> | conserved<br>hypothetical protein | CV_3909<br>CV_3910<br>CV_3911                                                | -                 | -                                                                                  |                                           | hypothetical protein |     |    |                              |
| <b>CV_0338</b> | conserved<br>hypothetical protein | CV_0338<br>CV_0339                                                           |                   |                                                                                    |                                           | hypothetical protein |     |    |                              |
| <b>CV_3452</b> | conserved<br>hypothetical protein | CV_3450<br>CV_3451<br>CV_3452<br>CV_3453<br>CV_3454                          | 5e <sup>-73</sup> | <i>Pseudogulbenkiania</i> sp.<br>NH8B                                              | peptidase M22<br>glycoprotease            |                      | 100 | 57 | Probable<br>viral<br>protein |
| <b>CV_0256</b> | conserved<br>hypothetical protein | -                                                                            | 6e <sup>-25</sup> | <i>Lactococcus lactis</i> subsp.<br>lactis KF147                                   | tRNA-binding protein                      |                      | 93  | 33 |                              |
| <b>CV_3265</b> | hypothetical protein              | -                                                                            | -                 | -                                                                                  | hypothetical protein                      |                      | -   | -  | -                            |
| <b>CV_1754</b> | conserved<br>hypothetical protein | CV1749<br>CV1750<br>CV1751<br>CV1752<br>CV1753<br>CV1754<br>CV1755<br>CV1756 | 0.0               | <i>Laribacter hongkongensis</i><br>HLHK9                                           | CRISPR-associated<br>protein, Csy1 family |                      | 92  | 66 |                              |
| <b>CV_1751</b> | conserved<br>hypothetical protein | CV1749<br>CV1750                                                             | 3e <sup>-50</sup> | <i>Verminephrobacter</i><br><i>aporrectodeae</i> subsp.<br><i>tuberculatae</i> At4 | CRISPR-associated Csy4<br>family protein  |                      | 97  | 49 |                              |

|                |                                |                                          |                    |                                           |  |                                        |     |    |                        |
|----------------|--------------------------------|------------------------------------------|--------------------|-------------------------------------------|--|----------------------------------------|-----|----|------------------------|
|                |                                | CV1751                                   |                    |                                           |  |                                        |     |    |                        |
|                |                                | CV1752                                   |                    |                                           |  |                                        |     |    |                        |
|                |                                | CV1753                                   |                    |                                           |  |                                        |     |    |                        |
|                |                                | CV1754                                   |                    |                                           |  |                                        |     |    |                        |
|                |                                | CV1755                                   |                    |                                           |  |                                        |     |    |                        |
|                |                                | CV1756                                   |                    |                                           |  |                                        |     |    |                        |
| <b>CV_4246</b> | conserved hypothetical protein | CV_4246<br>CV_4247                       | -                  | -                                         |  | conserved hypothetical protein         | -   | -  | -                      |
| <b>CV_3475</b> | hypothetical protein           | -                                        | -                  | -                                         |  | hypothetical protein                   | -   | -  |                        |
| <b>CV_3151</b> | hypothetical protein           | -                                        | -                  | -                                         |  | hypothetical protein                   | -   | -  |                        |
| <b>CV_0714</b> | conserved hypothetical protein | -                                        | 1e <sup>-84</sup>  | <i>Rhodanobacter</i> sp. 2APBS1           |  | NmrA family protein                    | 100 | 57 |                        |
| <b>CV_3236</b> | conserved hypothetical protein | -                                        | 3e <sup>-99</sup>  | <i>Acinetobacter baumannii</i> ATCC 19606 |  | ThiJ/Pfpl domain-containing protein    | 69  | 57 |                        |
| <b>CV_0348</b> | conserved hypothetical protein | CV_0345<br>CV_0346<br>CV_0347<br>CV_0348 | 9e <sup>-40</sup>  | <i>Burkholderia</i> sp. JV3               |  | peptidoglycan-binding domain 1 protein | 31  | 42 | Probable viral protein |
| <b>CV_2925</b> | conserved hypothetical protein | CV_2926<br>CV_2927                       | 1e <sup>-165</sup> | <i>Hylemonella gracilis</i> ATCC 19624    |  | exopolyphosphatase-like protein        | 99  | 72 | -                      |
| <b>CV_0342</b> | Conserved hypothetical protein | CV_0342<br>CV_0343<br>CV_0344            | 5e <sup>-77</sup>  | <i>Laribacter hongkongensis</i> HLHK9     |  | phage tail protein                     | 96  | 66 | Probable viral protein |
| <b>CV_1311</b> | hypothetical protein           | -                                        | -                  | -                                         |  | hypothetical protein                   | -   | -  | -                      |

|                |                                   |                               |                    |                                                              |                                          |    |    |                              |
|----------------|-----------------------------------|-------------------------------|--------------------|--------------------------------------------------------------|------------------------------------------|----|----|------------------------------|
| <b>CV_3160</b> | conserved<br>hypothetical protein | -                             | 3e <sup>-48</sup>  | <i>Achromobacter xylosoxidans</i><br>AXX-A                   | MarR family transcriptional<br>regulator | 91 | 54 |                              |
| <b>CV_1144</b> | conserved<br>hypothetical protein | -                             | 5e <sup>-54</sup>  | <i>Delftia</i> sp. Cs1-4                                     | DinB family protein                      | 94 | 49 |                              |
| <b>CV_4296</b> | conserved<br>hypothetical protein | -                             | -                  | -                                                            | conserved hypothetical                   | -  | -  |                              |
| <b>CV_0785</b> | conserved<br>hypothetical protein | CV_0785<br>CV_0786            | 4e <sup>-111</sup> | <i>Pseudogulbenkiania</i> sp.<br>NH8B                        | methionine biosynthesis<br>protein MetW  | 96 | 79 |                              |
| <b>CV_3599</b> | hypothetical protein              | CV_3599<br>CV_3560            | -                  | -                                                            | hypothetical protein                     | -  | -  | Probable<br>viral<br>protein |
| <b>CV_0011</b> | hypothetical protein              | CV_0011<br>CV_0012<br>CV_0013 | -                  | -                                                            | hypothetical protein                     | -  | -  |                              |
| <b>CV_0212</b> | conserved<br>hypothetical protein | -                             | 2e <sup>-42</sup>  | <i>Yersinia enterocolitica</i> subsp.<br>enterocolitica 8081 | esterase YqiA                            | 94 | 40 |                              |
| <b>CV_3543</b> | conserved<br>hypothetical protein | -                             | 8e <sup>-51</sup>  | <i>Pseudogulbenkiania</i> sp.<br>NH8B                        | sporulation domain<br>containing protein | 88 | 46 |                              |
| <b>CV_2113</b> | hypothetical protein              | CV_2112<br>CV_2113<br>CV_2114 |                    |                                                              | hypothetical protein                     |    |    |                              |
| <b>CV_3581</b> | conserved<br>hypothetical protein | -                             | 0.0                | <i>Lutiella nitroferrum</i> 2002                             | Cupin 4 family protein                   | 99 | 68 | Probable<br>viral<br>protein |
| <b>CV_0746</b> | hypothetical protein              | -                             | -                  | -                                                            | hypothetical protein                     | -  | -  |                              |

|                |                                |                                          |                    |                                          |                                                                                  |    |    |                        |
|----------------|--------------------------------|------------------------------------------|--------------------|------------------------------------------|----------------------------------------------------------------------------------|----|----|------------------------|
| <b>CV_2902</b> | conserved hypothetical protein | -                                        | -                  | -                                        | conserved hypothetical protein                                                   | -  | -  |                        |
| <b>CV_3388</b> | conserved hypothetical protein | -                                        | 1e <sup>-32</sup>  | <i>Vibrio splendidus</i> ATCC 33789      | hypothetical acetyltransferase                                                   | 95 | 38 |                        |
| <b>CV_3387</b> | conserved hypothetical protein | -                                        | 7e <sup>-118</sup> | <i>Lutiella nitroferrum</i> 2002         | segregation and condensation protein B                                           | 97 | 83 |                        |
| <b>CV_2971</b> | hypothetical protein           | -                                        | -                  | -                                        | hypothetical protein                                                             | -  | -  |                        |
| <b>Cv_2738</b> | conserved hypothetical protein | CV_2738<br>CV_2739<br>CV_2740            | 2e <sup>-178</sup> | <i>Ralstonia solanacearum</i> CMR15      | putative ATPase family associated with various cellular activities (AAA) protein | 98 | 69 |                        |
| <b>CV_0178</b> | conserved hypothetical protein | -                                        | 6e <sup>-107</sup> | <i>Pseudogulbenkiania</i> sp. NH8B       | alanine racemase domain containing protein                                       | 99 | 76 |                        |
| <b>CV_2075</b> | conserved hypothetical protein | CV_2073<br>CV_2074<br>CV_2075            | 3e <sup>-138</sup> | <i>Pseudogulbenkiania</i> sp. NH8B       | molybdopterin binding domain containing protein                                  | 98 | 79 |                        |
| <b>CV_0407</b> | hypothetical protein           | CV_0407<br>CV_0408<br>CV_0409<br>CV_0410 | 3e <sup>-21</sup>  | <i>Ralstonia solanacearum</i> CFBP2957   | phage protein                                                                    | 99 | 39 | Probable viral protein |
| <b>CV_3155</b> | conserved hypothetical protein | -                                        | 1e <sup>-77</sup>  | <i>Burkholderia</i> sp. CCGE1002         | diamine N-acetyltransferase                                                      | 96 |    |                        |
| <b>CV_0791</b> | conserved hypothetical protein | -                                        | 4e <sup>-94</sup>  | <i>Lutiella nitroferrum</i> 2002         | ybaK/epsC protein                                                                | 98 | 84 |                        |
| <b>CV_3157</b> | conserved hypothetical protein | CV_3157                                  | 3e <sup>-88</sup>  | <i>Pseudomonas brassicacearum</i> subsp. | kinase inhibitor                                                                 | 98 | 70 |                        |

|                |                                   | CV_3158                                             |                   | brassicacearum<br>NFM421                    |                                                  |     |    |
|----------------|-----------------------------------|-----------------------------------------------------|-------------------|---------------------------------------------|--------------------------------------------------|-----|----|
| <b>CV_3425</b> | conserved<br>hypothetical protein | -                                                   | 1e <sup>-22</sup> | <i>Mycobacterium kansasii</i><br>ATCC 12478 | putative transcriptional<br>regulatory protein   | 83  | 35 |
| <b>CV_3201</b> | conserved<br>hypothetical protein | CV_3201<br>CV_3202                                  | 7e <sup>-59</sup> | <i>Ktedonobacter racemifer</i><br>DSM 44963 | thioesterase superfamily<br>protein              | 92  | 54 |
| <b>CV_0330</b> | conserved<br>hypothetical protein | -                                                   | -                 | -                                           | conserved hypothetical<br>protein                | -   | -  |
| <b>CV_0565</b> | hypothetical protein              | -                                                   | 7e <sup>-59</sup> | <i>Lutiella nitroferrum</i><br>2002         | Hemerythrin HHE cation<br>binding domain protein | 98  | 53 |
| <b>CV_0156</b> | conserved<br>hypothetical protein | -                                                   | 2e <sup>-91</sup> | <i>Lutiella nitroferrum</i> 2002            | adenylate cyclase                                | 100 | 82 |
| <b>CV_3623</b> | conserved<br>hypothetical protein | CV_3622<br>CV_3623                                  | -                 | -                                           | hypothetical protein                             | -   | -  |
| <b>CV_0053</b> | conserved<br>hypothetical protein | CV_0050<br>CV_0051<br>CV_0052<br>CV_0053<br>CV_0054 | -                 | -                                           | - conserved hypothetical<br>protein              | -   | -  |

Supplementary Table S3: Re-annotation and genomic context of hypothetical and/or conserved hypothetical proteins expressed exclusively in control condition.

| ORF     | Protein                           | Operon                        | E-value            | Organism                           | Protein                             | Query coverage (%) | Identity (%) |
|---------|-----------------------------------|-------------------------------|--------------------|------------------------------------|-------------------------------------|--------------------|--------------|
| CV_1445 | hypothetical protein              | -                             | -                  | -                                  | hypothetical protein                | -                  | -            |
| CV_1007 | conserved<br>hypothetical protein | -                             | 7e <sup>-171</sup> | <i>Pseudogulbenkiana sp. NH8B</i>  | serine/threonine protein kinase     | 97                 | 75           |
| CV_0635 | hypothetical protein              | -                             | 6e <sup>-19</sup>  | <i>Roseiflexus sp. RS-1</i>        | putative PAS/PAC sensor protein     | 63                 | 31           |
| CV_1727 | conserved<br>hypothetical protein | -                             | 5e <sup>-70</sup>  | <i>Paenibacillus sp. HGF7</i>      | Cof-like hydrolase                  | 96                 | 44           |
| CV_3008 | hypothetical protein              | -                             | 3e <sup>-30</sup>  | <i>Burkholderia phymatum STM81</i> | response regulator receiver protein | 98                 | 33           |
| CV_0153 | conserved<br>hypothetical protein | CV_0153<br>CV_0153            | 2e <sup>-127</sup> | <i>Pseudogulbenkiana sp. NH8B</i>  | peptidase M48, Ste24p               | 98                 | 67           |
| CV_4304 | conserved<br>hypothetical protein | -                             | 2e <sup>-44</sup>  | <i>Lutiella nitroferrum 2002</i>   | YfaZ family protein                 | 100                | 48           |
| CV_2363 | conserved<br>hypothetical protein | -                             | 2e <sup>-72</sup>  | <i>Pseudogulbenkiana sp. NH8B</i>  | GAF domain-containing protein       | 91                 | 70           |
| CV_3513 | conserved<br>hypothetical protein | CV_3513<br>CV_3514            | -                  | -                                  | conserved hypothetical protein      | -                  | -            |
| CV_1711 | conserved<br>hypothetical protein | CV_1709<br>CV_1710<br>CV_1711 | -                  | -                                  | conserved hypothetical protein      | -                  | -            |

|                |                                   |                                          |                    |                                                                 |                                                   |    |    |
|----------------|-----------------------------------|------------------------------------------|--------------------|-----------------------------------------------------------------|---------------------------------------------------|----|----|
| <b>CV_2561</b> | hypothetical protein              | -                                        | -                  | -                                                               | hypothetical protein                              | -  | -  |
| <b>CV_3785</b> | conserved<br>hypothetical protein | -                                        | 1e <sup>-118</sup> | <i>Pseudogulbenkiania sp. NH8B</i>                              | NAD-dependent<br>epimerase/dehydratase            | 63 | 94 |
| <b>CV_1784</b> | hypothetical protein              | CV_1783<br>CV_1784                       | -                  | -                                                               | hypothetical protein                              | -  | -  |
| <b>CV_0286</b> | conserved<br>hypothetical protein | -                                        | -                  | -                                                               | conserved hypothetical protein                    | -  | -  |
| <b>CV_2486</b> | conserved<br>hypothetical protein | CV_2485                                  | -                  | -                                                               | conserved hypothetical protein                    | -  | -  |
| <b>CV_4122</b> | hypothetical protein              | CV_4122<br>CV_4123<br>CV_4124            | 1e <sup>-52</sup>  | <i>Acidovorax delafieldii 2AN</i>                               | acetyltransferase                                 | 92 | 51 |
| <b>CV_3423</b> | conserved<br>hypothetical protein | -                                        | -                  | -                                                               | conserved hypothetical protein                    | -  | -  |
| <b>CV_2149</b> | hypothetical protein              | -                                        | -                  | -                                                               | hypothetical protein                              | -  | -  |
| <b>CV_1753</b> | conserved<br>hypothetical protein | CV_1751<br>CV_1752<br>CV_1753<br>CV_1754 | 3e <sup>-130</sup> | <i>Laribacter hongkongensis<br/>HLHK9</i>                       | CRISPR-associated protein, Csy2<br>family         | 96 | 59 |
| <b>CV_2799</b> | conserved<br>hypothetical protein | CV_2798<br>CV_2799                       | 3e <sup>-63</sup>  | <i>Pseudomonas syringae pv.<br/>morsprunorum str. M302280PT</i> | non-ribosomal peptide synthetase<br>SyfB          | 71 | 41 |
| <b>CV_0913</b> | conserved<br>hypothetical protein | -                                        | -                  | -                                                               | conserved hypothetical protein                    | -  | -  |
| <b>CV_3937</b> | conserved<br>hypothetical protein | CV_3936<br>CV_3937                       | 4e <sup>-123</sup> | <i>Methylovorus<br/>glucosetrophus SIP3-4</i>                   | Succinylglutamate<br>desuccinylase/aspartoacylase | 96 | 58 |

|                |                                  |                                          |             |                                    |                                 |     |    |
|----------------|----------------------------------|------------------------------------------|-------------|------------------------------------|---------------------------------|-----|----|
| <b>CV_2329</b> | Putative uncharacterized protein | -                                        | $2e^{-167}$ | <i>Lutiella nitroferrum 2002</i>   | dihydrouridine synthase DuS     | 98  | 75 |
| <b>CV_3974</b> | conserved hypothetical protein   | CV_3973<br>CV_3974<br>CV_3975            | -           | -                                  | hypothetical protein            | -   | -  |
| <b>CV_2915</b> | hypothetical protein             | CV_2915<br>CV_2916<br>CV_2916            | $3e^{-155}$ | <i>Pseudogulbenkiania sp. NH8B</i> | permease, YjgP/YjgQ family      | 95  | 64 |
| <b>CV_2059</b> | conserved hypothetical protein   | CV_2058<br>CV_2059<br>CV_2060            | $8e^{-60}$  | <i>Lutiella nitroferrum 2002</i>   | anti sigma-E protein, RseA      | 100 | 58 |
| <b>CV_1999</b> | hypothetical protein             | CV_1999<br>CV_2000                       | $2e^{-107}$ | <i>Lutiella nitroferrum 2002</i>   | 20S proteasome A and B subunits | 99  | 81 |
| <b>CV_3720</b> | hypothetical protein             | CV_3719<br>CV_3720                       | $1e^{-161}$ | <i>Pseudogulbenkiania sp. NH8B</i> | hydrolase, TatD family          | 100 | 83 |
| <b>CV_2003</b> | hypothetical protein             | -                                        | -           | -                                  | hypothetical protein            | -   | -  |
| <b>CV_0373</b> | hypothetical protein             | -                                        | -           | -                                  | hypothetical protein            | -   | -  |
| <b>CV_3724</b> | hypothetical protein             | CV_3721<br>CV_3722<br>CV_3723<br>CV_3724 | $6e^{-139}$ | <i>Lutiella nitroferrum 2002</i>   | aminodeoxychorismate lyase      | 91  | 64 |



Supplementary Table S4: Protein Functional Category Classification, uniquely detected in oxidative stress condition.

| Pathway classification                                         |             |                                                                                                                |              |         |
|----------------------------------------------------------------|-------------|----------------------------------------------------------------------------------------------------------------|--------------|---------|
| Carbohydrate metabolism                                        | Gene name   | Description                                                                                                    | Uniprot code | ORF     |
| <b>Amino sugar and nucleotide sugar metabolism</b>             | <i>graD</i> | Probable Bifunctional: UDP-N-acetylglucosamineglucose-1-phosphate thymidyltransferase; Glucosamine-1-phosphate | Q7MBE7       | CV_3103 |
|                                                                | <i>ubiB</i> | Probable ubiquinone biosynthesis protein UbiB                                                                  | Q7NZD1       | CV_3784 |
| <b>Glyoxylate and dicarboxylate metabolism</b>                 | <i>gph</i>  | probable phosphoglycolate phosphatase                                                                          | Q7NX12       | CV_1817 |
| <b>Glycoside hydrolase</b>                                     | CV_2894     | Probable endoglucanase-related protein                                                                         | Q7NU09       | CV_2894 |
| Metabolism Energy                                              |             |                                                                                                                |              |         |
| <b>General metabolism Energy</b>                               | <i>adhC</i> | Alcohol dehydrogenase class III                                                                                | Q7P029       | CV_0740 |
|                                                                | CV_1452     | Probable iron-sulfur 4Fe-4S ferredoxin transmembrane protein                                                   | Q7NY23       | CV_1452 |
| <b>Nitrogen Metabolism</b>                                     |             |                                                                                                                |              |         |
|                                                                | <i>tap</i>  | probable methyl-accepting chemotaxis protein                                                                   | Q7NWR8       | CV_1912 |
|                                                                | <i>narH</i> | Nitrate reductase                                                                                              | Q7NV04       | CV_2542 |
| <b>Oxidative phosphorylation</b>                               |             |                                                                                                                |              |         |
|                                                                | <i>petB</i> | Cytochrome b                                                                                                   | Q7NQX8       | CV_4007 |
|                                                                | CV_3278     | Probable cytochrome b561                                                                                       | Q7NSZ1       | CV_3278 |
| <b>Oxidoreductase</b>                                          |             |                                                                                                                |              |         |
|                                                                | <i>yedY</i> | Sulfoxide reductase catalytic subunit <i>yedY</i>                                                              | Q7NZY0       | CV_0789 |
|                                                                | <i>msrA</i> | Peptide methionine sulfoxide reductase <i>MsrA</i>                                                             | Q7NVL7       | CV_2325 |
|                                                                | <i>ptr1</i> | Probable pteridine reductase                                                                                   | Q7NQK5       | CV_4132 |
| <b>dTDP-4-dehydrorhamnose reductase, NAD(P)-binding domain</b> |             |                                                                                                                |              |         |
|                                                                | CV_0714     | NmrA family protein                                                                                            | Q7P054       | CV_0714 |
|                                                                | CV_2738     | putative ATPase family associated with various cellular activities                                             | Q7NUG0       | CV_2738 |
| Metabolism of cofactor end vitamins                            |             |                                                                                                                |              |         |
| <b>Co-factors</b>                                              |             |                                                                                                                |              |         |
|                                                                | <i>thiE</i> | Thiamine-phosphate pyrophosphorylase                                                                           | Q7P1R3       |         |
|                                                                | <i>folE</i> | GTP cyclohydrolase 1                                                                                           | Q7NYZ2       | CV_1130 |
| <b>Folate biosynthesis</b>                                     |             |                                                                                                                |              |         |
|                                                                | <i>folC</i> | Folypolyglutamate synthase/dihydrofolate synthase                                                              | Q7NV28       | CV_2518 |

|                                             |         |                                                                                     |        |         |
|---------------------------------------------|---------|-------------------------------------------------------------------------------------|--------|---------|
| <b>Porphyrin and chlorophyll metabolism</b> |         |                                                                                     |        |         |
|                                             | hemF    | Coproporphyrinogen-III oxidase, aerobic                                             | Q7P012 | CV_0757 |
| <b>Thiamine metabolism</b>                  |         |                                                                                     |        |         |
|                                             | CV_3611 | Probable bifunctional dGTP-pyrophosphohydrolase/thiamine phosphate synthase         | Q7NS16 | CV_3611 |
| <b>Signal transduction</b>                  |         |                                                                                     |        |         |
| <b>Two-component system</b>                 |         |                                                                                     |        |         |
|                                             | pilR    | Two-component system, regulatory protein                                            | Q7P1Y9 | CV_0073 |
|                                             | qseB    | Transcriptional regulatory protein qseB                                             | Q7NZN1 | CV_0891 |
|                                             | glnG    | Nitrogen assimilation regulatory response regulator/transcription regulator protein | Q7NS35 | CV_3592 |
|                                             | evgS    | Sensor protein evgS                                                                 | Q7NVE3 | CV_2400 |
| <b>Signal transduction mechanisms</b>       |         |                                                                                     |        |         |
|                                             | barA    | Probable sensor/response regulator hybrid                                           | Q7NSC3 | CV_3503 |
|                                             | cheY    | probable response regulator                                                         | Q7P1N2 | CV_0181 |
| <b>Membrane transport</b>                   |         |                                                                                     |        |         |
| <b>ABC transporters</b>                     |         |                                                                                     |        |         |
|                                             | gltJ    | Glutamate/aspartate transport system permease                                       | Q7P1U3 | CV_0119 |
|                                             | CV_3922 | probable transcription regulator, TetR family                                       | Q7NR62 | CV_3922 |
|                                             | LolD    | Lipoprotein-releasing system ATP-binding protein                                    | Q7NTU0 | CV_2963 |
|                                             | hbpA    | Heme-binding protein A                                                              | Q7NWK8 | CV_1978 |
|                                             | mgIA    | Sugar ABC transporter, ATP-binding protein                                          | Q7NVJ4 | CV_2348 |
|                                             | CV_2982 | probable amino-acid transport system permease ABC transporter protein               | Q7NTS1 | CV_2982 |
|                                             | rbsA    | Ribose import ATP-binding protein RbsA                                              | Q7NTN6 | CV_3018 |
|                                             | dppA    | probable binding protein component of ABC dipeptide transporter                     | Q7NR48 | CV_3936 |
| <b>Pilus biogenesis</b>                     |         |                                                                                     |        |         |
|                                             | CV_3540 | Probable fimbrial biogenesis and twitching motility protein                         | Q7NS86 | CV_3540 |
|                                             | pilO    | Type 4 fimbrial biogenesis protein PilO                                             | Q7NZU0 | CV_0831 |
|                                             | pilN    | Type 4 fimbrial biogenesis protein PilN                                             | Q7NZT9 | CV_0832 |
| <b>Bacterial secretion system</b>           |         |                                                                                     |        |         |
|                                             | hlyA    | probable hemolysin                                                                  | Q7NWR2 | CV_1918 |
| <b>membrane protein</b>                     |         |                                                                                     |        |         |
|                                             | lolB    | Outer-membrane lipoprotein lolB                                                     | Q7NQS7 | CV_4060 |
|                                             | wcaI    | Probable glycosyl transferase                                                       | Q7NQW5 | CV_4021 |
|                                             | yehX    | probable ABC transporter ATP-binding protein                                        | Q7NPU8 | CV_4394 |
| <b>General Metabolism Amino acid</b>        |         |                                                                                     |        |         |
| <b>Metabolism Amino acid</b>                | CV_0170 | probable methyl transferase                                                         | Q7P1P3 | CV_0170 |
|                                             | mdmC    | O-methyltransferase                                                                 | Q7P1M0 | CV_0193 |
|                                             | CV_0785 | methionine biosynthesis protein MetW                                                | Q7NZY4 | CV_0785 |

|                                        |         |                                                                      |        |         |
|----------------------------------------|---------|----------------------------------------------------------------------|--------|---------|
|                                        | hipO    | Hippurate hydrolase hipO                                             | Q7NWU5 | CV_1884 |
|                                        | pabB    | Anthranilate synthase                                                | Q7NSL1 | CV_3411 |
|                                        | hisH    | Imidazole glycerol phosphate synthase subunit hisH                   | Q7P0F1 | CV_0616 |
|                                        | astE    | Succinylglutamate desuccinylase                                      | Q7NU26 | CV_2877 |
|                                        | ddlA    | D-alanine--D-alanine ligase A ddlA                                   | Q7NV72 | CV_2472 |
|                                        | leuC    | 3-isopropylmalate dehydratase large subunit                          | Q7NUB6 | CV_2784 |
|                                        | CV_0178 | alanine racemase domain containing protein                           | Q7P1N5 | CV_0178 |
| <b>Metabolism of other amino acids</b> |         |                                                                      |        |         |
| <b>Glutathione metabolism,</b>         |         |                                                                      |        |         |
|                                        | gst     | Probable glutathione S-transferase                                   | Q7NZ36 | CV_1086 |
|                                        | gst3    | Glutathione S-transferase family protein                             | Q7NX54 | CV_1775 |
|                                        | kdsA    | 2-dehydro-3-deoxyphosphooctonate aldolase                            | Q7NUF4 | CV_2745 |
| <b>Translation</b>                     |         |                                                                      |        |         |
| <b>Ribosome</b>                        | rpIS    | 50S ribosomal protein L19                                            | Q7NRV7 | CV_3672 |
|                                        | rpmB    | 50S ribosomal protein L28                                            | Q7NSH0 | CV_3456 |
|                                        | rimO    | Ribosomal protein S12 methylthiotransferase RimO                     | Q7NYA1 | CV_1373 |
|                                        | entE    | 2,3-dihydroxybenzoate-AMP ligase                                     | Q7NXZ2 | CV_1484 |
|                                        | CV_0256 | tRNA-binding protein                                                 | Q7P1F7 | CV_0256 |
| <b>Transcription</b>                   |         |                                                                      |        |         |
| <b>transcription regulation</b>        | hydG    | Two-component response sensor-transcriptional regulatory protein     | Q7NZM5 | CV_0897 |
|                                        | CV_1302 | Probable bacterial regulatory helix-turn-helix proteins, araC family | Q7NYH2 | CV_1302 |
|                                        | CV_3425 | putative transcriptional regulatory protein                          | Q7NSJ9 | CV_3425 |
|                                        | CV_2699 | probable transcriptional regulator, TetR family                      | Q7NUJ8 | CV_2699 |
|                                        | fnr     | probable transcriptional regulator, Crp/Fnr family                   | Q7MBF0 | CV_2708 |
|                                        | CV_3160 | Bacterial regulatory protein, MarR                                   | Q7NT99 | CV_3160 |
|                                        | CV_4141 | Probable AraC-family transcriptional regulator                       | Q7NQJ6 | CV_4141 |
|                                        | rpoH    | RNA polymerase sigma factor                                          | Q7NQD4 | CV_4206 |
|                                        | rpoS    | RNA polymerase sigma factor                                          | Q7NRU8 | CV_3682 |
|                                        | CV_0539 | Probable transcriptional regulator, MarR-family                      | Q7P0M7 | CV_0539 |
|                                        | emrR    | Transcriptional repressor emr operon, MarR family                    | Q7P000 | CV_0769 |
|                                        | zntR    | probable transcriptional regulator, MerR family                      | Q7NYW9 | CV_1153 |
|                                        | CV_1779 | probable transcriptional regulator, MerR family                      | Q7NX50 | CV_1779 |
|                                        | yigN    | probable periplasmic protein                                         | Q7NV71 | CV_2473 |
|                                        | ycjC    | probable transcriptional regulator                                   | Q7NWG8 | CV_2021 |
| <b>Lipid metabolism</b>                |         |                                                                      |        |         |
| <b>Metabolism Fatty Acid</b>           | cfa     | Cyclopropane-fatty-acyl-phospholipid synthase                        | Q7NZE4 | CV_0978 |

|                                         |              |                                                               |        |         |
|-----------------------------------------|--------------|---------------------------------------------------------------|--------|---------|
|                                         | <i>lpxH</i>  | UDP-2,3-diacylglucosamine hydrolase                           | Q7NT75 | CV_3186 |
|                                         | <i>paaG</i>  | probable enoyl-CoA hydratase                                  | Q7NX66 | CV_1763 |
|                                         | <i>paaG</i>  | Enoyl-CoA hydratase                                           | Q7NWA8 | CV_2082 |
|                                         | <i>ydiD</i>  | probable long chain fatty-acid CoA ligase                     | Q7NX49 | CV_1780 |
|                                         | <i>ugpQ</i>  | Glycerophosphodiester phosphodiesterase                       | Q7NRX6 | CV_3652 |
|                                         | <i>lipB</i>  | Octanoyltransferase                                           | Q7NTG0 | CV_3096 |
| <b>Peptidoglycan</b>                    |              |                                                               |        |         |
| <b>Peptidoglycan</b>                    | <i>dacB</i>  | Serine-type D-Ala-D-Ala carboxypeptidase                      | Q7NYZ7 | CV_1125 |
| <b>Replication and DNA Repair</b>       |              |                                                               |        |         |
|                                         | CV_1144      | DinB family protein                                           | Q7NYX8 | CV_1144 |
| <b>Base excision repair</b>             |              |                                                               |        |         |
|                                         | <i>nth</i>   | Endonuclease III                                              | Q7NSX6 | CV_3293 |
|                                         | <i>mutM</i>  | Formamidopyrimidine-DNA glycosylase                           | Q7NQS5 | CV_4062 |
|                                         | <i>ung</i>   | Uracil-DNA glycosylase                                        | Q7P1I1 | CV_0232 |
| <b>Cell motility</b>                    |              |                                                               |        |         |
| <b>Flagellar Assembly</b>               |              |                                                               |        |         |
|                                         | <i>flgA</i>  | probable flagella basal body P-ring formation protein flgA    | Q7NZC3 | CV_0999 |
|                                         | <i>fliC2</i> | Flagellin                                                     | Q7NV50 | CV_2495 |
|                                         | <i>flhF</i>  | Flagellar biosynthetic protein FlhF                           | Q7NZ98 | CV_1024 |
| <b>Bacterial chemotaxis</b>             |              |                                                               |        |         |
|                                         | CV_0257      | probable methyl-accepting chemotaxis protein                  | Q7P1F6 | CV_0257 |
|                                         | <i>trg</i>   | probable methyl-accepting chemotaxis protein                  | Q7NYE6 | CV_1328 |
|                                         | CV_1698      | probable methyl-accepting chemotaxis protein                  | Q7NXC9 | CV_1698 |
|                                         | CV_4155      | probable methyl-accepting chemotaxis transducer               | Q7NQI2 | CV_4155 |
|                                         | <i>trg</i>   | probable methyl-accepting chemotaxis protein                  | Q7NU51 | CV_2852 |
|                                         | <i>tar</i>   | probable methyl-accepting chemotaxis protein with HAMP domain | Q7NRX9 | CV_3649 |
| <b>Nucleotide metabolism</b>            |              |                                                               |        |         |
| <b>Purine metabolism</b>                | <i>dgt</i>   | dGTPase                                                       | Q7MBE5 | CV_3210 |
|                                         | <i>purN</i>  | Phosphoribosylglycinamide formyltransferase                   | Q7NS11 | CV_3616 |
|                                         | <i>relA</i>  | GTP diphosphokinase                                           | Q7NRS8 | CV_3702 |
| <b>Pyrimidine metabolism</b>            |              |                                                               |        |         |
|                                         | <i>udk</i>   | Uridine kinase                                                | Q7NZ37 | CV_1085 |
| <b>Folding, sorting and degradation</b> |              |                                                               |        |         |
| <b>RNA degradation</b>                  | <i>orn</i>   | Oligoribonuclease                                             | Q7NVH5 | CV_2368 |
| <b>chaperone</b>                        |              |                                                               |        |         |
|                                         | CV_4000      | probable competence protein ComM                              | Q7NQY5 | CV_4000 |
| <b>Haemin-degrading</b>                 |              |                                                               |        |         |
|                                         | CV_3897      | Probable hemin degrading factor                               | Q7NR87 | CV_3897 |
| <b>proteolysis</b>                      |              |                                                               |        |         |

|                                                                     |             |                                                                             |        |         |
|---------------------------------------------------------------------|-------------|-----------------------------------------------------------------------------|--------|---------|
|                                                                     | <i>colA</i> | probable microbial collagenase                                              | Q7NWI8 | CV_2001 |
|                                                                     | <i>pepP</i> | Xaa-Pro aminopeptidase                                                      | Q7NTD6 | CV_3122 |
|                                                                     | <i>pcp</i>  | Pyrrrolidone-carboxylate peptidase                                          | Q7NT84 | CV_3176 |
|                                                                     | CV_3452     | Peptidase M22 glycoprotease                                                 | Q7NSH4 | CV_3452 |
|                                                                     | <i>ptrB</i> | Prolyl oligopeptidase family protein                                        | Q7NSC4 | CV_3502 |
| <b>CRISPR-associated protein</b>                                    |             |                                                                             |        |         |
|                                                                     | CV_1751     | CRISPR-associated Csy4 family protein                                       | Q7NX77 | CV_1751 |
|                                                                     | CV_1754     | CRISPR-associated protein, Csy1 family                                      | Q7NX74 | CV_1754 |
| <b>Cell cycle</b>                                                   |             |                                                                             |        |         |
|                                                                     | CV_3387     | segregation and condensation protein B                                      | Q7NSN3 | CV_3387 |
|                                                                     | CV_3543     | sporulation domain containing protein                                       | Q7NS83 | CV_3543 |
|                                                                     | <i>ftsJ</i> | cell division protein FtsJ                                                  | Q7NRI3 | CV3798  |
| <b>Acetylation</b>                                                  |             |                                                                             |        |         |
| <b>Histone deacetylase superfamily</b>                              | <i>hda</i>  | Histone deacetylase                                                         | Q7NRU4 | CV_3686 |
| <b>GCN5-related N-acetyltransferase, Acyl-CoA N-acyltransferase</b> |             |                                                                             |        |         |
|                                                                     | CV_0453     | probable acetyl transferase                                                 | Q7P0W2 | CV_0453 |
|                                                                     | <i>elaA</i> | Probable ElaA protein                                                       | Q7P1Y6 | CV_0076 |
|                                                                     | CV_3388     | hypothetical acetyltransferase                                              | Q7NSN2 | CV_3388 |
|                                                                     | CV_3155     | diamine N-acetyltransferase                                                 | Q7NTA4 | CV_3155 |
| <b>OTHERS</b>                                                       |             |                                                                             |        |         |
|                                                                     | <i>T9J2</i> | Latex allergen                                                              | Q7P0X4 | CV_0441 |
|                                                                     | <i>mpl</i>  | UDP-N-acetylmuramate: L-alanyl-gamma-D-glutamyl-meso-diaminopimelate ligase | Q7NXG0 | CV_1666 |
|                                                                     | CV_2336     | probable ThiJ/Pfpl family protein                                           | Q7NVK6 | CV_2336 |
|                                                                     | CV_2923     | probable partition-related protein                                          | Q7NTY0 | CV_2923 |
|                                                                     | <i>hyuA</i> | Hydantoin racemase                                                          | Q7NTB3 | CV_3146 |
|                                                                     | CV_3201     | thioesterase superfamily protein                                            | Q7NT60 | CV_3201 |
|                                                                     | CV_3236     | ThiJ/Pfpl domain-containing protein                                         | Q7NT28 | CV_3236 |
|                                                                     | <i>hflX</i> | GTP-binding protein hflX hflX                                               | Q7NS94 | CV_3532 |
|                                                                     | <i>pcm</i>  | Protein-L-isoaspartate O-methyltransferase                                  | Q7NRV0 | CV_3680 |
|                                                                     | <i>phuR</i> | Probable TonB-dependent receptor                                            | Q7NR88 | CV_3896 |
|                                                                     | CV_0565     | Hemerythrin HHE cation binding domain protein                               | Q7P0K2 | CV_0565 |
|                                                                     | CV_2075     | molybdopterin binding domain containing protein                             | Q7NWB5 | CV_2075 |
|                                                                     | <i>anmK</i> | Anhydro-N-acetylmuramic acid kinase                                         | Q7NV67 | CV_2478 |
|                                                                     | CV_0156     | adenylate cyclase                                                           | Q7P1Q7 | CV_0156 |
|                                                                     | CV_0212     | esterase YqiA                                                               | Q7P1K1 | CV_0212 |
|                                                                     | CV_0791     | ybaK/ebxC protein                                                           | Q7NZX8 | CV_0791 |
|                                                                     | CV_2925     | exopolyphosphatase-like protein                                             | Q7NTX8 | CV_2925 |
|                                                                     | CV_3157     | kinase inhibitor                                                            | Q7NTA2 | CV_3157 |
| <b>Ubiquinone and other terpenoid-quinone biosynthesis,</b>         |             |                                                                             |        |         |

|                                  |             |                                                   |        |         |
|----------------------------------|-------------|---------------------------------------------------|--------|---------|
|                                  | ubiF        | Monoxygenase                                      | Q7NYZ0 | CV_1132 |
|                                  | entC        | Isochorismate synthase EntC / MenF                | Q7NXZ1 | CV_1485 |
| <b>YD repeat,</b>                |             |                                                   |        |         |
|                                  | <i>rhcC</i> | Probable rhc-related protein                      | Q7NYN5 | CV_1238 |
| <b>Viral</b>                     |             |                                                   |        |         |
|                                  | CV_1315     | probable phage-related protein                    | Q7NYF9 | CV_1315 |
|                                  | <i>ycfE</i> | probable bacteriophage tail fiber protein         | Q7P176 | CV_0337 |
|                                  | CV_0339     | probable bacteriophage tail fiber protein         | Q7P174 | CV_0339 |
|                                  | CV_0338     | Putative uncharacterized protein                  | Q7P175 | CV_0338 |
|                                  | CV_0347     | Probable phage virion                             | Q7P167 | CV_0347 |
|                                  | CV_0343     | Probable phage FluMu protein gp47                 | Q7P170 | CV_0343 |
|                                  | <i>ydfM</i> | probable tail fiber assembly protein              | Q7P173 | CV_0340 |
|                                  | CV_0345     | probable bacteriophage base plate protein         | Q7P169 | CV_0345 |
|                                  | CV_0346     | probable bacteriophage tail protein               | Q7P168 | CV_0346 |
|                                  | CV_0348     | peptidoglycan-binding domain 1 protein            | Q7P166 | CV_0348 |
|                                  | CV_0342     | phage tail protein                                | Q7P171 | CV_0342 |
|                                  | CV_0407     | phage protein                                     | Q7P107 | CV_0407 |
|                                  | CV_0418     | Probable tail fiber-related protein               | Q7P0Z7 | CV_0418 |
|                                  | CV_0417     | Probable phage baseplate component                | Q7P0Z8 | CV_0417 |
|                                  | CV_0419     | probable tail fiber assembly-like protein         | Q7P0Z6 | CV_0419 |
|                                  | CV_0422     | probable bacteriophage baseplate assembly protein | Q7P0Z3 | CV_0422 |
|                                  | CV_0429     | probable bacteriophage tail fiber protein         | Q7P0Y6 | CV_0429 |
|                                  | CV_0424     | putative pyocin R2_PP, tail fiber protein         | Q7P0Z1 | CV_0424 |
|                                  | CV_0425     | Putative uncharacterized protein                  | Q7P0Z0 | CV_0425 |
|                                  | CV_0431     | probable bacteriophage protein                    | Q7P0Y4 | CV_0431 |
|                                  | CV_0432     | probable tail fiber assembly protein              | Q7P0Y3 | CV_0432 |
| Putative uncharacterized protein | CV_4246     | Putative uncharacterized protein                  | Q7NQ94 | CV_4246 |
|                                  | CV_0011     | Putative uncharacterized protein                  | Q7P250 | CV_0011 |
|                                  | CV_2113     | Putative uncharacterized protein                  | Q7NW77 | CV_2113 |
|                                  | CV_0053     | Putative uncharacterized protein                  | Q7P208 | CV_0053 |
|                                  | CV_3151     | Putative uncharacterized protein                  | Q7NTA8 | CV_3151 |
|                                  | CV_3265     | Putative uncharacterized protein                  | Q7NT00 | CV_3265 |
|                                  | CV_3475     | Putative uncharacterized protein                  | Q7NSF1 | CV_3475 |
|                                  | CV_1311     | Putative uncharacterized protein                  | Q7NYG3 | CV_1311 |
|                                  | CV_4296     | Putative uncharacterized protein                  | Q7NQ44 | CV_4296 |
|                                  | CV_3599     | Putative uncharacterized protein                  | Q7NS28 | CV_3599 |
|                                  | CV_3581     | Cupin 4 family protein                            | Q7NS46 | CV_3581 |
|                                  | CV_0746     | Putative uncharacterized protein                  | Q7P0Z3 | CV_0746 |
|                                  | CV_2902     | Putative uncharacterized protein                  | Q7NU01 | CV_2902 |
|                                  | CV_2971     | Putative uncharacterized protein                  | Q7NTT2 | CV_2971 |
|                                  | CV_3623     | Putative uncharacterized protein                  | Q7NS04 | CV_3623 |
|                                  | CV_0330     | Putative uncharacterized protein                  | Q7P183 | CV_0330 |

Supplementary Table S5: Protein Functional Category Classification, uniquely detected in the control condition.

| Pathway classification                                          |           |                                                        |                   |         |
|-----------------------------------------------------------------|-----------|--------------------------------------------------------|-------------------|---------|
| Biosynthesis of secondary metabolites                           | Gene name | Description                                            | Uniprot accession | ORF     |
| <b>Terpenoid backbone biosynthesis</b>                          | ispD      | 2-C-methyl-D-erythritol 4-phosphate cytidyltransferase | Q7NYL6            | CV_1258 |
|                                                                 | uppS      | Undecaprenyl pyrophosphate synthase                    | Q7NVZ0            | CV_2200 |
| <b>Streptomycin biosynthesis, Inositol phosphate metabolism</b> |           |                                                        |                   |         |
|                                                                 | suhB2     | Myo-inositol-1(Or 4)-monophosphatase                   | Q7P148            | CV_0366 |
| Translation                                                     |           |                                                        |                   |         |
| <b>Ribosome</b>                                                 | rpsI      | 30S ribosomal protein S9                               | Q7NRT4            | CV_3696 |
|                                                                 | rplK      | 50S ribosomal protein L11                              | P60100            | CV_4197 |
|                                                                 | rplU      | 50S ribosomal protein L21                              | Q7NZS3            | CV_0848 |
| <b>Aminoacyl-tRNA biosynthesis</b>                              |           |                                                        |                   |         |
|                                                                 | CV_2329   | tRNA-dihydrouridine synthase                           | Q7NVL3            | CV_2329 |
|                                                                 | rluB      | Pseudouridylate synthase                               | Q7NQJ1            | CV_4146 |
|                                                                 | truA      | tRNA pseudouridine synthase A                          | Q7NUD6            | CV_2764 |
|                                                                 | trmD      | tRNA (guanine-N(1)-)-methyltransferase                 | Q7MBD6            | CV_3673 |
| Amino acid metabolism                                           |           |                                                        |                   |         |
| <b>Amino acid metabolism</b>                                    |           |                                                        |                   |         |
|                                                                 | dadB      | Alanine racemase 2                                     | Q7NRI8            | CV_3793 |
|                                                                 | trpD      | Anthranilate phosphoribosyltransferase                 | Q7NW17            | CV_2173 |
|                                                                 | cysE      | Serine O-acetyltransferase                             | Q7P217            | CV_0044 |
|                                                                 | CV_0106   | probable O-methyltransferase                           | Q7P1V6            | CV_0106 |
|                                                                 | dapC      | Succinyldiaminopimelate transaminase                   | Q7P0W4            | CV_0451 |
|                                                                 | CV_0748   | probable transformylase                                | Q7P021            | CV_0748 |
|                                                                 | murI      | Glutamate racemase                                     | Q7NYS0            | CV_1203 |

|                                         |             |                                                          |        |         |
|-----------------------------------------|-------------|----------------------------------------------------------|--------|---------|
|                                         | CV_3407     | probable prephenate dehydrogenase                        | Q7NSL5 | CV_3407 |
|                                         | CV_3753     | probable alanyl-tRNA synthetase related protein          | Q7NRM7 | CV_3753 |
|                                         | glsA        | Glutaminase                                              | Q7NQH9 | CV_4158 |
| <b>Metabolism nucleic acid</b>          |             |                                                          |        |         |
| <b>Purine metabolism</b>                |             |                                                          |        |         |
|                                         | apaH        | Bis(5'-nucleosyl)-tetraphosphatase, symmetrical apaH     | Q7NQS0 | CV_4067 |
|                                         | CV_0033     | probable ribose-phosphate diphosphokinase                | Q7P228 | CV_0033 |
|                                         | guaC        | GMP reductase guaC                                       | Q7NTY1 | CV_4158 |
|                                         | CV_3720     | hydrolase, TatD family                                   | Q7NRR0 | CV_3720 |
|                                         | rluD        | Pseudouridine synthase                                   | Q7NVZ8 | CV_2192 |
| <b>DNA metabolic process</b>            |             |                                                          |        |         |
|                                         | CV_2171     | probable adenine-specific methylase                      | Q7NW19 | CV_2171 |
| <b>Replication and repair</b>           |             |                                                          |        |         |
|                                         | CV_2089     | probable ATP-dependent RNA helicase                      | Q7NWA1 | CV_2089 |
|                                         | dnaQ        | DNA-directed DNA polymerase, epsilon chain               | Q7NYL7 | CV_1257 |
|                                         | recJ        | Exodeoxyribonuclease VII                                 | Q7NV69 | CV_2475 |
|                                         | CV_3454     | Probable DNA-directed DNA polymerase, bacteriophage-type | Q7NSH2 | CV_3454 |
|                                         | recO        | DNA repair protein recO                                  | Q7NWC1 | CV_1612 |
|                                         | radA        | DNA repair protein radA                                  | Q7NTS9 | CV_2974 |
|                                         | dnaG        | DNA primase                                              | Q7NRL7 | CV_3763 |
|                                         | recB        | Exodeoxyribonuclease V, beta subunit                     | Q7NQR1 | CV_4076 |
| <b>Folding, sorting and degradation</b> |             |                                                          |        |         |
| <b>Proteolysis</b>                      |             |                                                          |        |         |
|                                         | CV_0153     | peptidase M48, Ste24p                                    | Q7P1R0 | CV_0153 |
|                                         | <i>ycpP</i> | probable collagenase                                     | Q7P1E7 | CV_0266 |
|                                         | CV_1270     | probable dipeptidyl aminopeptidase                       | Q7NYK4 | CV_1270 |
|                                         | CV_1999     | 20S proteasome A and B subunits                          | Q7NWJ0 | CV_1999 |



|                                           |         |                                                          |        |         |
|-------------------------------------------|---------|----------------------------------------------------------|--------|---------|
| <b>Hydrolysis</b>                         |         |                                                          |        |         |
|                                           | CV_1727 | Cof-like hydrolase                                       | Q7NXA0 | CV_1727 |
| Cell envelope biogenesis, outer membrane, |         |                                                          |        |         |
| <b>Membrane protein</b>                   |         |                                                          |        |         |
|                                           | CV_0228 | probable beta-1,4- glucosyltransferase                   | Q7P1I5 | CV_0228 |
|                                           | mltA    | Peptidoglycan N-acetylmuramoylhydrolase                  | Q7NRM1 | CV_3759 |
| <b>Lipoprotein</b>                        |         |                                                          |        |         |
|                                           | vacJ    | Lipoprotein                                              | Q7P0X1 | CV_0444 |
|                                           | CV_1235 | probable lipoprotein                                     | Q7NYN8 | CV_1235 |
| Transcription regulator activity          |         |                                                          |        |         |
|                                           | CV_0635 | putative PAS/PAC sensor protein                          | Q7P0D2 | CV_0635 |
|                                           | CV_1077 | probable transcriptional regulator, TetR family          | Q7NZ45 | CV_1077 |
|                                           | CV_2059 | anti sigma-E protein, RseA                               | Q7NWD1 | CV_2059 |
|                                           | CV_2323 | probable transcriptional regulatory protein, LuxR family | Q7NVL9 | CV_2323 |
|                                           | CV_2476 | probable signal peptide protein                          | Q7NV68 | CV_2476 |
|                                           | CV_3008 | response regulator receiver protein                      | Q7NTP6 | CV_3008 |
|                                           | CV_3051 | probable transcriptional regulator lacI family           | Q7NTK3 | CV_3051 |
|                                           | CV_3919 | probable transcriptional regulator, AsnC family          | Q7NR65 | CV_3919 |
| Signal transduction                       |         |                                                          |        |         |
| <b>Two-component system</b>               |         |                                                          |        |         |
|                                           | tap     | Methyl-accepting chemotaxis protein IV                   | Q7P0E0 | CV_0627 |
|                                           | glnD    | [Protein-PII] uridylyltransferase                        | Q7NTY6 | CV_2917 |
|                                           | yfhA    | probable two-component transcriptional regulator         | Q7NQC0 | CV_4220 |
|                                           | hprK    | HPr kinase/phosphorylase                                 | Q7NST5 | CV_3335 |
| Cell motility                             |         |                                                          |        |         |
| <b>Bacterial chemotaxis</b>               |         |                                                          |        |         |
|                                           | tsr     | probable methyl-accepting chemotaxis transducer          | Q7P055 | CV_0713 |

|                                                    |             |                                                       |        |         |
|----------------------------------------------------|-------------|-------------------------------------------------------|--------|---------|
|                                                    | motB2       | Chemotaxis motB protein                               | Q7NWX2 | CV_2027 |
| <b>Flagellar assembly</b>                          |             |                                                       |        |         |
|                                                    | fliD        | Flagellar hook-associated protein                     | Q7NTR0 | CV_2994 |
|                                                    | fliG2       | Flagellar motor switch protein                        | Q7NTQ6 | CV_2998 |
|                                                    | <i>fliN</i> | probable flagellar motor switch protein               | Q7NTQ2 | CV_3002 |
|                                                    | flg11       | Flagellar P-ring protein 1                            | Q7NXX9 | CV_2881 |
| Carbohydrate metabolism                            |             |                                                       |        |         |
| <b>Glyoxylate and dicarboxylate metabolism</b>     |             |                                                       |        |         |
|                                                    | CV_1622     | probable formate dehydrogenase                        | Q7NXX4 | CV_1622 |
| <b>Amino sugar and nucleotide sugar metabolism</b> |             |                                                       |        |         |
|                                                    | CV_0818     | probable glycosyltransferase                          | Q7NZV3 | CV_0818 |
|                                                    | rfbU        | Lipopolysaccharide biosynthesis protein               | Q7NZU7 | CV_0824 |
|                                                    | CV_1007     | serine/threonine protein kinase                       | Q7NZB5 | CV_1007 |
|                                                    | CV_1160     | probable glycosyl transferase                         | Q7NYW2 | CV_1160 |
|                                                    | CV_1493     | probable b-N-acetylhexosaminidase                     | Q7NXY3 | CV_1493 |
|                                                    | cpbD        | Carbohydrate-binding protein                          | Q7NUV5 | CV_2592 |
|                                                    | fruK        | 1-phosphofructokinase                                 | Q7NTK1 | CV_3053 |
|                                                    | fruA        | Protein-N p-phosphohistidine-sugar phosphotransferase | Q7NTK0 | CV_3054 |
|                                                    | galE        | UDP-glucose 4-epimerase                               | Q7NRA0 | CV_3884 |
|                                                    | rfbG        | CDPglucose 4,6-dehydratase                            | Q7NR92 | CV_3892 |
|                                                    | <i>pmrF</i> | probable dolichyl-phosphate b-D-mannosyltransferase   | Q7P020 | CV_0749 |
| Membrane transport                                 |             |                                                       |        |         |
| <b>ABC transporters,</b>                           |             |                                                       |        |         |
|                                                    | dppB        | Dipeptide transport system permease protein           | Q7NZ24 | CV_1098 |
|                                                    | CV_1560     | probable iron transport system ATP-binding protein    | Q7NXR6 | CV_1560 |
|                                                    | exbB1       | Biopolymer transport protein                          | Q7M7G2 | CV_1972 |

|                                     |             |                                                            |        |         |
|-------------------------------------|-------------|------------------------------------------------------------|--------|---------|
|                                     | CV_2295     | probable ABC transporter system, ATP-binding protein       | Q7NVP7 | CV_2295 |
|                                     | CV_2915     | permease, YjgP/YjgQ family                                 | Q7NTY8 | CV_2915 |
|                                     | CV_3734     | probable ATP-binding component, ABC transporter            | Q7NRP6 | CV_3734 |
|                                     | CV_1681     | probable ABC transporter, periplasmic binding protein      | Q7NXE6 | CV_1681 |
|                                     | CV_0447     | probable ABC transport system substrate-binding protein    | Q7P0W8 | CV_0447 |
| Metabolism of cofactors na vitamins |             |                                                            |        |         |
| <b>Riboflavin metabolism</b>        |             |                                                            |        |         |
|                                     | ribD        | Diaminohydroxyphosphoribosylaminopyrimidine deaminase ribD | Q7NYI4 | CV_1290 |
| <b>vitamin metabolic process</b>    |             |                                                            |        |         |
|                                     | cobC        | Cobalamin biosynthetic protein                             | Q7NXQ2 | CV_1574 |
|                                     | CV_3067     | probable cobalamin synthesis protein                       | Q7NTI7 | CV_3067 |
| <b>Folate biosynthesis</b>          |             |                                                            |        |         |
|                                     | folP        | Dihydropteroate synthase                                   | Q7NRI5 | CV_3054 |
| <b>Biotin metabolism</b>            |             |                                                            |        |         |
|                                     | birA        | Biotin acetyl-CoA-carboxylase synthetase                   | Q7P0T0 | CV_0486 |
|                                     | bioC        | Biotin synthesis protein                                   | Q7NPW6 | CV_4376 |
|                                     | bioB        | Biotin synthase                                            | Q7NPW1 | CV_4381 |
| CRISPR-associated protein Csy2      |             |                                                            |        |         |
|                                     | CV_1753     | CRISPR-associated protein, Csy2 family                     | Q7NX75 | CV_1753 |
| Fatty acid metabolism               |             |                                                            |        |         |
|                                     | rfaF        | ADP-heptose--LPS heptosyltransferase II                    | Q7NW98 | CV_2092 |
|                                     | <i>paaF</i> | probable enoyl-CoA hydratase                               | Q7NV60 | CV_2485 |
|                                     | plsX        | fatty acid/phospholipid biosynthesis protein               | Q7NSK6 | CV_3417 |
|                                     | lpxB        | Lipid-A-disaccharide synthase                              | Q7NVY1 | CV_2209 |

|                                             |             |                                                               |        |         |
|---------------------------------------------|-------------|---------------------------------------------------------------|--------|---------|
|                                             | CV_4051     | probable long chain fatty-acid CoA ligase                     | Q7NQT6 | CV_4051 |
| <b>Cell division</b>                        |             |                                                               |        |         |
|                                             | ftsK        | Cell division ftsk transmembrane protein                      | Q7NV66 | CV_2479 |
| <b>Iron-sulphur cluster binding protein</b> |             |                                                               |        |         |
|                                             | <i>ykgF</i> | Probable iron-sulphur protein                                 | Q7NTM6 | CV_3028 |
|                                             | CV_3886     | Probable Fe-S oxidoreductase                                  | Q7NR98 | CV_3886 |
| <b>Energy metabolism</b>                    |             |                                                               |        |         |
| <b>Cytochrome c, class I</b>                |             |                                                               |        |         |
|                                             | CV_3056     | probable cytochrome c precursor                               | Q7NTJ8 | CV_3056 |
| <b>Other</b>                                |             |                                                               |        |         |
|                                             | CV_2363     | GAF domain-containing protein                                 | Q7NVI0 | CV_2363 |
|                                             | CV_2978     | probable geranylgeranyl-diphosphate geranylgeranyltransferase | Q7NTS5 | CV_2978 |
|                                             | nfsA        | Oxygen-insensitive NADPH nitroreductase                       | Q7NSC6 | CV_3500 |
|                                             | CV_3724     | aminodeoxychorismate lyase                                    | Q7NRQ6 | CV_3724 |
|                                             | CV_3822     | probable N-acetylmuramoyl-L-alanine amidase                   | Q7NRF9 | CV_3822 |
|                                             | rsgA2       | Putative ribosome biogenesis GTPase RsgA 2                    | Q7NVH8 | CV_2365 |
|                                             | CV_3888     | probable methyltransferase                                    | Q7NR96 | CV_3888 |
|                                             | moeB        | Molybdopterin biosynthesis MoeB protein                       | Q7NQ82 | CV_4258 |
|                                             | phoD        | Phosphodiesterase I                                           | Q7NQ58 | CV_4282 |
|                                             | mreC        | Rod shape-determining protein mreC                            | Q7NPY4 | CV_4358 |
|                                             | mrda        | Penicillin-binding protein 2                                  | Q7NPY2 | CV_4360 |
|                                             | ppnK        | Probable inorganic polyphosphate/ATP-NAD kinase               | Q7NVM0 | CV_2322 |
|                                             | queC        | 7-cyano-7-deazaguanine synthase                               | Q7NSB9 | CV_3507 |
|                                             | CV_4092     | probable aldehyde dehydrogenase                               | Q7NQP5 | CV_4092 |
| <b>Putative uncharacterized protein</b>     |             |                                                               |        |         |
|                                             | CV_1445     | Putative uncharacterized protein                              | Q7NY30 | CV_1445 |
|                                             | CV_3513     | UPF0276 protein                                               | Q7NSB3 | CV_3513 |

|         |                                  |        |         |
|---------|----------------------------------|--------|---------|
| CV_1711 | Putative uncharacterized protein | Q7NXB6 | CV_1711 |
| CV_2561 | Putative uncharacterized protein | Q7NUY6 | CV_2561 |
| CV_3785 | Putative uncharacterized protein | Q7NRJ6 | CV_3785 |
| CV_1784 | Putative uncharacterized protein | Q7NX45 | CV_1784 |
| CV_0286 | Putative uncharacterized protein | Q7P1C7 | CV_0286 |
| CV_3423 | Putative uncharacterized protein | Q7NSK1 | CV_3423 |
| CV_2149 | Putative uncharacterized protein | Q7NW41 | CV_2149 |
| CV_0913 | Putative uncharacterized protein | Q7NZK9 | CV_0913 |
| CV_3974 | Putative uncharacterized protein | Q7NR11 | CV_3974 |
| CV_2003 | Putative uncharacterized protein | Q7NWI6 | CV_2003 |
| CV_0373 | Putative uncharacterized protein | Q7P141 | CV_0373 |
| CV_2890 | Putative uncharacterized protein | Q7NU13 | CV_2890 |
| CV_2799 | Putative uncharacterized protein | Q7NUA4 | CV_2799 |
| CV_3937 | Putative uncharacterized protein | Q7NR47 | CV_3937 |
| CV_4122 | Putative uncharacterized protein | Q7NQL5 | CV_4122 |
| CV_2486 | Conserved hypothetical protein   | Q7NV59 | CV_2486 |
| CV_4304 | Putative uncharacterized protein | Q7NQ36 | CV_4304 |

Supplementary Table S6: List of the primers used in this study.

| <b>Primer name</b> | <b>Sequence</b>           |
|--------------------|---------------------------|
| CV3027 Forward     | AGCACCAGTCTGTTGATCGAG     |
| CV3027 Reverse     | CTGGATACTTGCGGCTGATAA     |
| CV4376 Forward     | AGATCGCGTTGACCTACGAC      |
| CV4376 Reverse     | TAGCGCTCGTACGCTTCTTC      |
| 16s Forward        | TGTAGCAGTGAAATGCGTAGAGATG |
| 16s Reverse        | CCACGCTTTCGTGCATGAG       |
